# Supplementary material
Source: PubMed Central journal article supplement (PMC1567922)

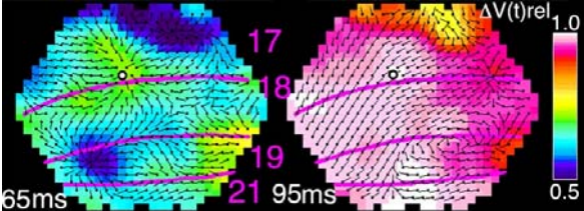

Supplement: pnas_0604925103_3.pdf [file pnas_0604925103_3.pdf]

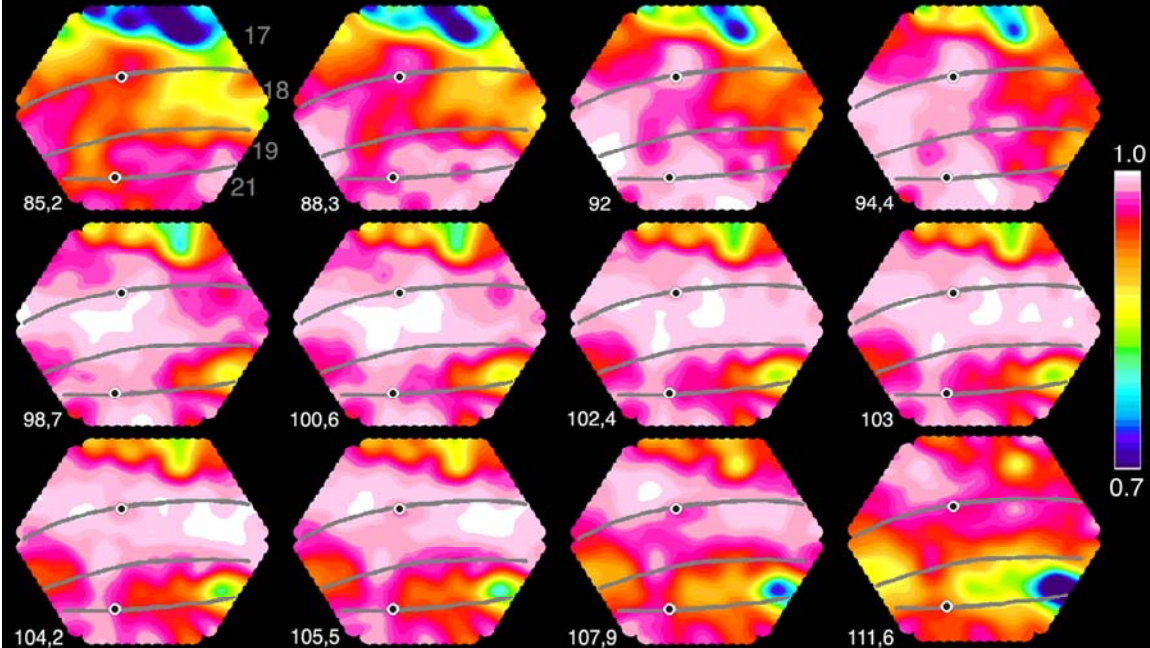

Supplement: pnas_0604925103_4.pdf [file pnas_0604925103_4.pdf]

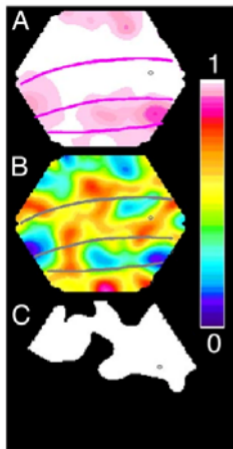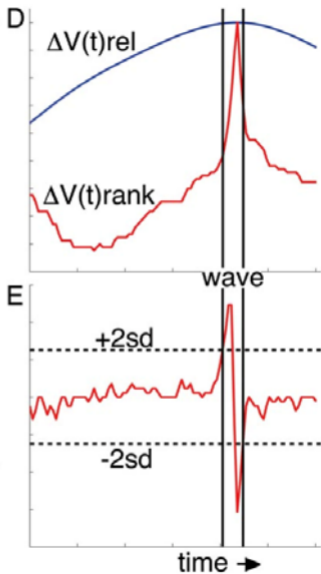

Supplement: pnas_0604925103_6.pdf [file pnas_0604925103_6.pdf]

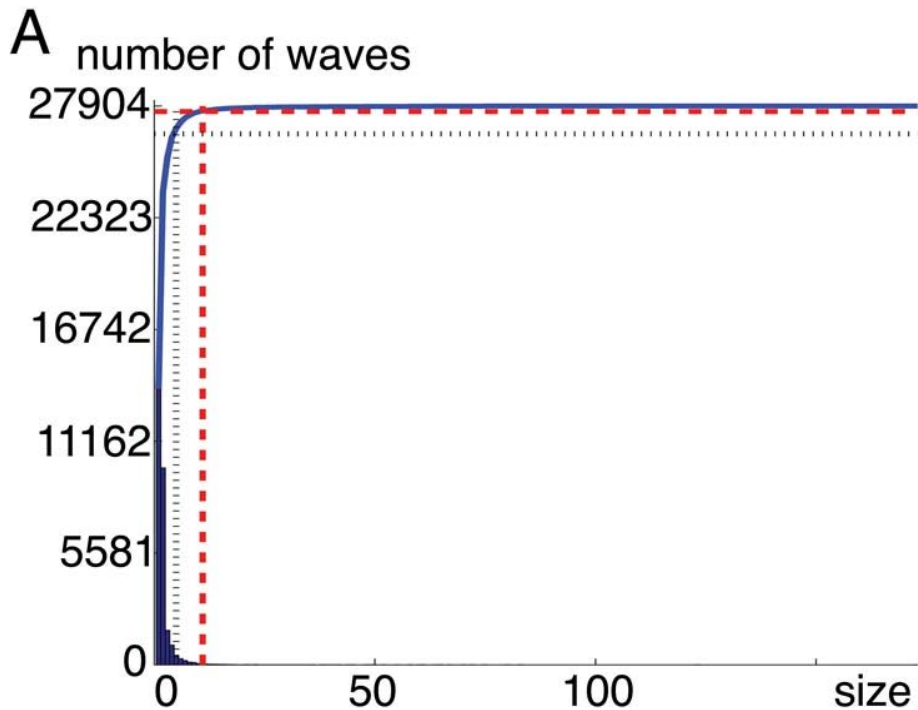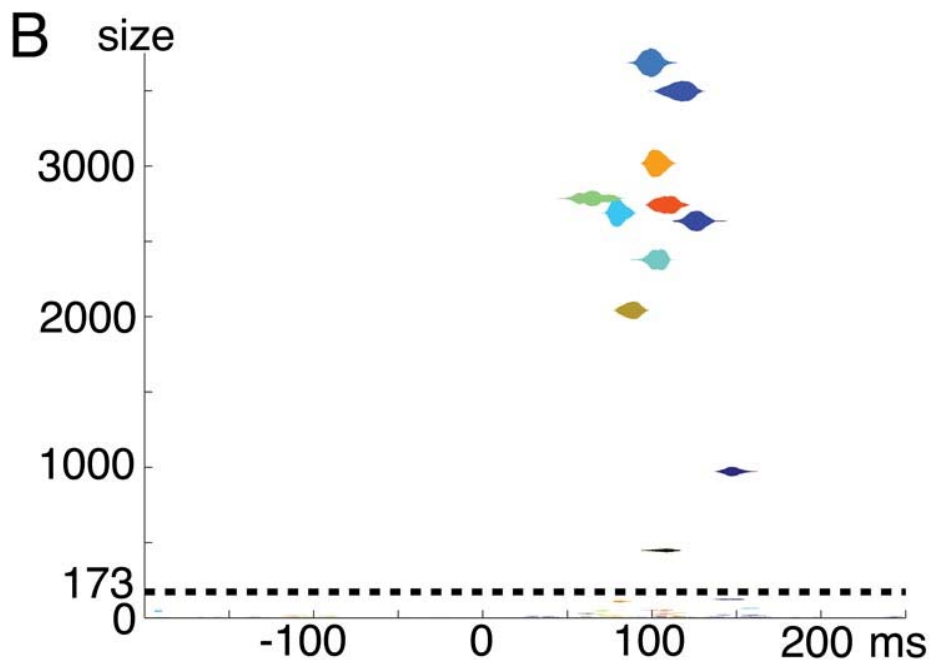

Supplement: pnas_0604925103_8.pdf [file pnas_0604925103_8.pdf]

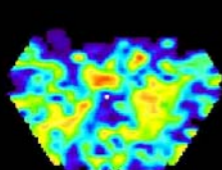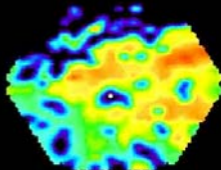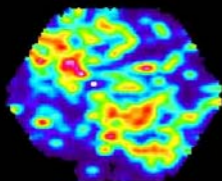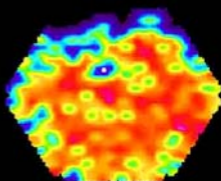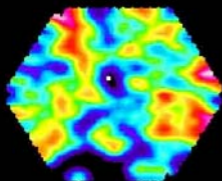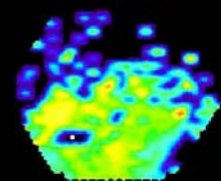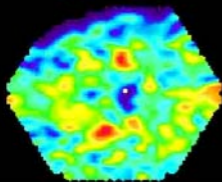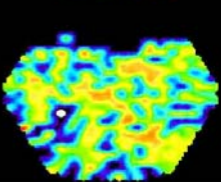

Supplement: pnas_0604925103_9.pdf [file pnas_0604925103_9.pdf]
